# Supplementary material for: Association between Dietary Fibre Intake and Colorectal Adenoma: A Systematic Review and Meta-Analysis
Source: MDPI journal article supplement (doi:10.3390/ijerph18084168), 2021-04-15
Supplement: s1 [file s1]

## Supplementary

**Table S1.** Full search strategy.

| SET | PubMed/MEDLINE                             |
|-----|--------------------------------------------|
| 1   | "Dietary Fiber" [Mesh:NoExp]               |
| 2   | "Bread" [Mesh]                             |
| 3   | "Edible Grain" [Mesh]                      |
| 4   | "Fruit" [Mesh]                             |
| 5   | "Vegetables" [Mesh]                        |
| 6   | Fiber [tiab]                               |
| 7   | Fibre [tiab]                               |
| 8   | Sets 1-7 were combined with "OR"           |
| 9   | "Colorectal Neoplasms" [Mesh]              |
| 10  | "Colonic Neoplasms" [Mesh]                 |
| 11  | "Rectal Neoplasms" [Mesh]                  |
| 12  | "Intestinal Polyps" [Mesh]                 |
| 13  | "Adenomatous Polyps" [Mesh]                |
| 14  | Sets 9-13 were combined with "OR"          |
| 15  | "Prospective Studies" [MeSH Terms]         |
| 16  | "Cross-Sectional Studies" [MeSH Terms]     |
| 17  | "Follow-Up Studies" [MeSH Terms]           |
| 18  | "Surveys and Questionnaires" [MeSH Terms]  |
| 19  | "Incidence" [MeSH Terms]                   |
| 20  | "Cohort Studies" [MeSH Terms]              |
| 21  | "epidemiology" [MeSH Terms]                |
| 22  | Sets 15-21 were combined with "OR"         |
| 23  | Sets 8, 14 and 22 were combined with "AND" |

**Table S2.** Studies excluded with reasons after full-text assessment.

| Author Year [Ref]                                                   | Number | Reasons for Exclusion                                 |
|---------------------------------------------------------------------|--------|-------------------------------------------------------|
| Austin, 2007; Kune, 1991;<br>Haslam A, 2018; Kopp 2018; Zheng, 2019 | 5      | No data specifically referred to dietary fibre intake |
| Benito, 1993; Macquart, 1987; Neugut, 1993                          | 3      | Data non-extractable                                  |

**Table S3.** Quality assessment of the included studies.

| Author year [Ref]            | Selection |        |        | Comparability |         | Outcome/Exposure^ |        |        | Total score/9 |        |
|------------------------------|-----------|--------|--------|---------------|---------|-------------------|--------|--------|---------------|--------|
|                              | Item 1    | Item 2 | Item 3 | Item 4        | Item 5a | Item 5b           | Item 6 | Item 7 |               | Item 8 |
| Breuer-Katschinski, 2001     | *         | *      | -      | *             | -       | *                 | -      | *      | *             | 6      |
| Breuer-Katschinski, 2001 (a) | *         | *      | *      | *             | -       | *                 | -      | *      | *             | 7      |
| Byrd, 2020                   | *         | *      | *      | *             | -       | -                 | *      | *      | *             | 7      |
| Fu, 2014                     | *         | *      | *      | *             | *       | *                 | *      | *      | *             | 9      |
| Fuchs, 1999                  | -         | *      | *      | *             | *       | *                 | *      | *      | -             | 7      |
| Giovannucci, 1992            | *         | *      | *      | *             | *       | *                 | *      | -      | *             | 8      |
| Haile, 1997                  | *         | *      | *      | *             | -       | *                 | *      | *      | *             | 8      |
| Hoff, 1986                   | *         | *      | *      | *             | -       | -                 | -      | *      | -             | 5      |
| Haslam, 2017                 | *         | *      | *      | *             | -       | -                 | *      | -      | -             | 5      |
| Kunzmann, 2015               | *         | *      | *      | *             | *       | *                 | *      | *      | *             | 9      |
| Little, 1993                 | *         | *      | *      | *             | *       | *                 | -      | *      | -             | 7      |
| Lubin, 1997                  | *         | *      | *      | *             | -       | *                 | *      | *      | *             | 8      |
| Martinez, 1996               | *         | *      | *      | *             | *       | *                 | *      | *      | -             | 8      |
| Mathew, 2004                 | *         | *      | *      | *             | *       | *                 | *      | *      | *             | 9      |
| Mujtaba, 2018                | *         | *      | *      | *             | *       | *                 | *      | *      | *             | 9      |
| Nimptach, 2014               | -         | *      | *      | *             | -       | *                 | *      | *      | -             | 6      |
| Peters, 2003                 | *         | *      | *      | *             | *       | *                 | *      | *      | -             | 8      |
| Platz, 1997                  | *         | *      | *      | *             | *       | *                 | *      | *      | -             | 8      |
| Sandler, 1993                | *         | *      | *      | *             | -       | *                 | *      | *      | -             | 7      |
| Shaw, 2017                   | *         | *      | *      | *             | *       | *                 | *      | *      | -             | 8      |
| Tantamago, 2011              | -         | *      | -      | *             | *       | *                 | -      | *      | -             | 5      |
| Witte, 1996                  | *         | *      | *      | *             | -       | -                 | *      | *      | *             | 7      |

<sup>^</sup> Based on study design. The NOS assessed exposure for case-control and the outcome for cross-sectional and cohort studies.
